# Supplementary material for: Single-molecule imaging reveals the concerted release of myosin from regulated thin filaments
Source: eLife. 2021 Sep 27;10:e69184. doi: 10.7554/eLife.69184 (PMC8476120; doi:10.7554/eLife.69184)
Supplement: Figure 4—figure supplement 1—source data 1. [file elife-69184-fig4-figsupp1-data1.xlsx]

## Sheet: Sheet1
		Final Cluster Size - Measured
		0	1	2	3	4	5	6		Legend
Start Cluster Size	1	0.843603	0	0.102478	0.0274615	0.0217683	0.00234427	0.00234427		0
	2	0.67455	0.166889	0	0.10926	0.0409727	0.00233178	0.005996		0.2
	3	0.511104	0.166891	0.167564	0	0.102961	0.0417227	0.00975774		0.4
	4	0.644159	0.0192438	0.0813639	0.149561	0	0.0560432	0.0496286		0.6
	5	0.349605	0.140598	0.268133	0.0567205	0.0996906	0	0.0852527		0.8
	6	0.28285	0	0.313641	0.0601504	0.0902256	0.253133	0		1
