# Supplementary material for: Single-molecule imaging reveals the concerted release of myosin from regulated thin filaments
Source: eLife. 2021 Sep 27;10:e69184. doi: 10.7554/eLife.69184 (PMC8476120; doi:10.7554/eLife.69184)
Supplement: Figure 4—source data 1. [file elife-69184-fig4-data1.xlsx]

## Sheet: RTF dataset (Figure 4a)
Condition	#transitions	#kymographs
5nM	5933	14
10 nM	2207	9
Total	8140	23
Combined dataset for figure 4a					Start	Finish	Count	Probability		Start	Finish	Count	Probability
					1	0	666	0.295475		2	0	1055	0.368366
						1	0	0			1	933	0.325768
						2	912	0.404614			2	0	0
						3	439	0.194765			3	520	0.181564						Final Cluster Size - Regulated Thin Filament
						4	142	0.0629991			4	256	0.0893855						0	1	2	3	4	5	6		Legend
						5	56	0.0248447			5	67	0.0233939				Start Cluster Size	1	0.295475	0	0.404614	0.194765	0.0629991	0.0248447	0.0173026		0
						6	39	0.0173026			6	33	0.0115223					2	0.368366	0.325768	0	0.181564	0.0893855	0.0233939	0.0115223		0.2
						Total	2254				Total	2864						3	0.296422	0.246451	0.30778	0	0.068711	0.036343	0.044293		0.4
																		4	0.201717	0.178827	0.344778	0.203147	0	0.0486409	0.0228898		0.6
Start	Finish	Count	Probability		Start	Finish	Count	Probability		Start	Finish	Count	Probability					5	0.251613	0.196774	0.219355	0.2	0.1	0	0.0322581		0.8
3	0	522	0.296422		4	0	141	0.201717		5	0	78	0.251613					6	0.27381	0.234127	0.107143	0.293651	0.0396825	0.0515873	0		1
	1	434	0.246451			1	125	0.178827			1	61	0.196774
	2	542	0.30778			2	241	0.344778			2	68	0.219355
	3	0	0			3	142	0.203147			3	62	0.2
	4	121	0.068711			4	0	0			4	31	0.1
	5	64	0.036343			5	34	0.0486409			5	0	0
	6	78	0.044293			6	16	0.0228898			6	10	0.0322581
	Total	1761				Total	699				Total	310
Start	Finish	Count	Probability		Start	Finish	Count	Probability		Start	Finish	Count	Probability
6	0	69	0.27381		7	0	24	0.208696		8	0	40	0.25974
	1	59	0.234127			1	19	0.165217			1	37	0.24026
	2	27	0.107143			2	13	0.113043			2	13	0.0844156
	3	74	0.293651			3	39	0.33913			3	47	0.305195
	4	10	0.0396825			4	5	0.0434783			4	6	0.038961
	5	13	0.0515873			5	5	0.0434783			5	5	0.0324675
	6	0	0			6	10	0.0869565			6	6	0.038961
	Total	252				Total	115				Total	154
Start	Finish	Count	Probability
9	0	39	0.246835
	1	31	0.196203
	2	36	0.227848
	3	32	0.202532
	4	7	0.0443038
	5	11	0.0696203
	6	2	0.0126582
	Total	158

## Sheet: Predicted dataset (Figure 4b)
		Final Cluster Size - Predicted
		0	1	2	3	4	5	6		Legend
Start Cluster Size	1	0.242973	0	0.645669	0.0950151	0.0139822	0.00205759	0.00030279		0
	2	0.0107117	0.386862	0	0.514016	0.0756414	0.0111312	0.00163804		0.2
	3	0.000488696	0.0264745	0.478075	0	0.423473	0.0623174	0.00917048		0.4
	4	2.29704e-05	0.00165919	0.0449423	0.541044	0	0.359438	0.052894		0.6
	5	1.14093e-06	0.000103014	0.00372046	0.0671838	0.6066	0	0.322391		0.8
	6	7.55354e-08	8.18408e-06	0.000369469	0.0088958	0.12048	0.870247	0		1

## Sheet: Tm only dataset (Figure 4c)
	Condition	#transitions	#kymographs
	10 nM	117	2
	15 nM	1714	10
	20 nM	501	7
	Total	2332	19
					Start	Finish	Count	Probability		Start	Finish	Count	Probability
	Combined data for Figure 4c				1	0	299	0.39085		2	0	242	0.339888
						1	0	0			1	231	0.324438
						2	238	0.311111			2	0	0
						3	101	0.132026			3	106	0.148876						Final Cluster Size - Tropomyosin (only) Thin Filament
						4	77	0.100654			4	80	0.11236						0	1	2	3	4	5	6		Legend
						5	25	0.0326797			5	25	0.0351124				Start Cluster Size	1	0.39085	0	0.311111	0.132026	0.100654	0.0326797	0.0326797		0
						6	25	0.0326797			6	28	0.0393258					2	0.339888	0.324438	0	0.148876	0.11236	0.0351124	0.0393258		0.2
						Total	765	1.14641			Total	712	1.12219					3	0.301508	0.246231	0.276382	0	0.11809	0.0226131	0.0351759		0.4
																		4	0.30033	0.254125	0.214521	0.145215	0	0.0330033	0.0528053		0.6
Start	Finish	Count	Probability		Start	Finish	Count	Probability		Start	Finish	Count	Probability					5	0.292453	0.273585	0.245283	0.122642	0.0377358	0.00943396	0.0188679		0.8
3	0	120	0.301508		4	0	91	0.30033		5	0	31	0.292453					6	0.30303	0.227273	0.219697	0.143939	0.0681818	0.0378788	0		1
	1	98	0.246231			1	77	0.254125			1	29	0.273585
	2	110	0.276382			2	65	0.214521			2	26	0.245283
	3	0	0			3	44	0.145215			3	13	0.122642
	4	47	0.11809			4	0	0			4	4	0.0377358
	5	9	0.0226131			5	10	0.0330033			5	1	0.00943396
	6	14	0.0351759			6	16	0.0528053			6	2	0.0188679
	Total	398				Total	303				Total	106
Start	Finish	Count	Probability
6	0	40	0.30303
	1	30	0.227273
	2	29	0.219697
	3	19	0.143939
	4	9	0.0681818
	5	5	0.0378788
	6	0	0
	Total	132
