# Supplementary material for: Single-molecule imaging reveals the concerted release of myosin from regulated thin filaments
Source: eLife. 2021 Sep 27;10:e69184. doi: 10.7554/eLife.69184 (PMC8476120; doi:10.7554/eLife.69184)
Supplement: Figure 5—source data 1. [file elife-69184-fig5-data1.xlsx]

## Sheet: Figure 4
	Predicted Catastrophic Collapse	Measured Catastrophic Collapse					Error
# Myosins	Expected	RJMCMC Method	RTFs	Tm Only			Tm + Tn	Tm Only
1	0.242961	0.839667	0.295475	0.39085			0.0178056	0.0431222
2	0.0107087	0.675	0.368366	0.339888			0.0238046	0.0378538
3	0.000487926	0.506333	0.296422	0.301508			0.0215217	0.040848
4	2.27633e-05	0.636	0.201717	0.30033			0.0314387	0.0602582
5	1.08099e-06	0.339	0.251613	0.292453			0.0357814	0.0965473
6	5.20757e-08	0.263333	0.27381	0.30303			0.0365124	0.0542639
